# Supplementary material for: Global patterns of mangrove resource utilization: a systematic review
Source: Frontiers journal article supplement (doi:10.3389/fsrma.2024.1395724), 2024-09-25
Supplement: Table_1.DOCX [file Table_1.DOCX]

Supplementary Material

# Justification for exclusion of articles from the analysis with examples of articles excluded

| **Reason for exclusion** | **Article title** |
| --- | --- |
| Remote sensing / Mapping | Segmenting mangrove ecosystems drone images using SLIC superpixels |
| A WebGIS-Based Study for Managing Mangroves of Godavari Wetland, Andhra Pradesh, India |
| Mangrove Mapping and Above-Ground Biomass Change Detection using Satellite Images in Coastal Areas of Thai Binh Province, Vietnam |
| Understanding Dynamics of Mangrove Forest on Protected Areas of Hainan Island, China: 30 Years of Evidence from Remote Sensing |
| Application of Sentinel-2 Multispectral Data for Habitat Mapping of Pacific Islands: Palau Republic (Micronesia, Pacific Ocean) |
| Application of Sentinel-2 Multispectral Data for Habitat Mapping of Pacific Islands: Palau Republic (Micronesia, Pacific Ocean) |
| Mapping Height and Aboveground Biomass of Mangrove Forests on Hainan Island Using UAV-LiDAR Sampling |
| Habitat complexity, Structure and productivity | Impact of deforestation on mangrove tree diversity, biomass and community dynamics in the Segara Anakan Lagoon, Java, Indonesia: A ten-year perspective |
| Climatic Controls on the Distribution of Foundation Plant Species in Coastal Wetlands of the Conterminous United States: Knowledge Gaps and Emerging Research Needs |
| Structural characteristics, above-ground biomass and productivity of mangrove forest situated in areas with different levels of pollution in the Niger Delta, Nigeria |
| Classification of Mangrove Species Using Combined WordView-3 and LiDAR Data in Mai Po Nature Reserve, Hong Kong |
| Detrital traits affect substitutability of a range-expanding foundation species across latitude |
| Responses of soil and plants to spatio-temporal changes in landscape under different land use in Imo watershed, southern Nigeria |
| A general framework for propagule dispersal in mangroves |
| Microclimate Influences Mangrove Freeze Damage: Implications for Range Expansion in Response to Changing Macroclimate |
| Structure and regeneration status of mangrove patches along the estuarine and coastal stretches of Kerala, India |
| Land Use Land Cover Changes (LULCC) | Land use-induced change in trophic state of Shenzhen Bay (South China) over the past half-century |
| Land-based and climatic stressors of mangrove cover change in the Auckland Region, New Zealand |
| The effect of anthropogenic drivers on spatial patterns of mangrove land use on the Amazon coast |
| What Happened to the Forests of Sierra Leone? |
| Monitoring mangrove forest cover declination at kilim karst geoforest park, Langkawi from 2005 to 2017 using geospatial technology |
| Analysis of Physicochemical parameters and/ or Biogeochemistry | The Physiochemical Condition of Mangrove Ecosystems in The Coastal District of Sulamo, Kupang, East Nusa Tenggara, Indonesia |
| Bioavailability and sequential extraction of mercury in soils and organisms of a mangrove contaminated by a chlor-alkali plant |
| Stable isotopes indicate ecosystem restructuring following climate-driven mangrove dieback |
| The application of delta C-13, TOC and C/N geochemistry of mangrove sediments to reconstruct Holocene paleoenvironments and relative sea levels, Puerto Rico |
| Mangrove Sediment Microbiome: Adaptive Microbial Assemblages and Their Routed Biogeochemical Processes in Yunxiao Mangrove National Nature Reserve, China |
| Spatial planning and/or Mangrove management | Indonesia Provincial Spatial Plans on mangroves in era of decentralization: Application of content analysis to 27 provinces and blue carbonas overlooked components |
| Sustainable Management of Coastal Wetlands in Taiwan: A Review for Invasion, Conservation, and Removal of Mangroves |
| Conservation of mangroves in kuala perlis, malaysia-a case study of socio-economic attributes of fishermen driving valuation in sustaining livelihoods through forest management |
| Community Perception and Participation of Mangrove Ecosystem in Ngurah Rai Forest Park Bali, Indonesia |
| Socio-ecological assessment for environmental planning in coastal fishery areas: A case study in Brazilian mangroves |
| Pollution | Predicting the exposure of coastal species to plastic pollution in a complex island archipelago |
| Organochlorine concentrations in aquatic organisms from different trophic levels of the Sundarbans mangrove ecosystem and their implications for human consumption |
| Metals Content In Edible Gastropod From Blanakan Silvofishery Ponds |
| Microplastic Contamination on *Cerithidea obtusa* (Lamarck 1822) in Pangkal Babu Mangrove Forest Area, Tanjung Jabung Barat District, Jambi |
| Interrogating pollution sources in a mangrove food web using multiple stable isotopes |
| Impacts of Aquaculture / mariculture / Farming | Is Super-Intensification the Solution to Shrimp Production and Export Sustainability? |
| Domestic duck (Anas platyrhynchos) farming in mangrove forests in southern China: Unsustainable and sustainable patterns |
| Ecological impact of salt farming in mangroves on the habitat and food sources of *Austruca occidentalis* and *Littoraria subvittata* |
| Restoration/ rehabilitation | Jump-starting coastal wetland restoration: a comparison of marsh and mangrove foundation species |
| Species richness accelerates marine ecosystem restoration in the Coral Triangle |
| Mangrove rehabilitation along urban coastlines: A Singapore case study |
| Assessing mangrove clearance methods to minimise adverse impacts and maximise the potential to achieve restoration objectives |
| Genetics | The complete chloroplast genome sequence of *Pemphis acidula* (Lythraceae) |
| Genetic population structure of the mangrove snails *Littoraria subvittata* and *L. pallescens* in the Western Indian Ocean |
| Physiological and /or Biological studies | A general framework for propagule dispersal in mangroves |
| Global-scale dispersal and connectivity in mangroves |
| Archaeology | The sub-fossils of leaf fragments in sediments as an indicator of mangrove development in the Yingluo Bay, Guangxi, Southwest China over the last 130 years |
| Mangrove response to sea level rise: palaeoecological insights from macrotidal systems in northern Australia |
| Experimental studies/Isotope analysis | Utilization of SDS-PAGE and histochemistry for pharmacognostical studies on selected mangroves and halophytes from the Pichavaram, South India |
| Carbon isotope fractionation in the mangrove Avicennia marina has implications for food web and blue carbon research |
| Mangrove expansion into temperate marshes alters habitat quality for recruiting Callinectes spp. |
